# Supplementary material
Source: publisher figshare collection journal article supplement (https://gsapubs.figshare.com/ndownloader/files/31855736)
Supplement: Supplementary file 1 [file 31855736]

## Sheet: Sheet1
sample #	Age(Ma)	δ13C (‰)							δ2H (‰)							CPIa	Paqb
		nC27	Error (1σ)	nC29	Error (1σ)	nC31	Error (1σ)	wt. mean	nC27	Error (1σ)	nC29	Error (1σ)	nC31	Error (1σ)	wt. mean
B6-1-3	33.45	-30.4501	0.0786393	-30.8433	0.0054234	-31.4069	0.114343	-30.9565	-156.867	1.60417	-164.139	2.63993	-158.312	0.610847	-164.466	3.39981	0.260763
B6-1-2.5	33.4592	-30.8321	0.156689	-30.9343	0.0347095	-31.5546	0.0530559	-31.1397	-159.783	5.0871	-162.366	3.14168	-158.769	2.71336	-164.655	2.97157	0.37569
B6-1-2	33.4627	-30.3005	0.0176261	-30.5649	0.0831588	-31.1447	0.209253	-30.7341	-158.635	1.06305	-163.639	0.483524	-161.341	0.68714	-165.903	3.41382	0.248721
B6-1-1.5	33.4703	-31.3576	0.102922	-31.2414	0.274459	-32.0592	0.188946	-31.6077	-154.896	1.51102	-161.294	0.144933	-158.711	0.226176	-163.13	3.19356	0.28194
B6-1-1	33.4758	-30.7167	0.0506184	-30.5766	0.0587535	-31.1511	0.0338962	-30.822	-166.097	0.459778	-169.45	2.72734	-163.67	2.00483	-170.766	3.07046	0.367294
B6-2-4	33.4832	-30.9631	0.0360875	-30.7703	0.103319	-31.5321	0.241243	-31.0884	-165.532	0.832066	-179.001	1.15292	-165.709	1.28189	-174.946	3.37794	0.311221
B6-2-3.75	33.4891	-31.3433	0.194067	-31.2015	0.0133133	-31.6295	0.0399399	-31.4067	-169.085	0.993693	-175.043	0.137398	-174.086	0.361249	-177.583	3.59795	0.242387
B6-3.5	33.4935	-31.3341	0.0128012	-31.1953	0.0972895	-31.9091	0.0788557	-31.5231	-162.386	2.49145	-164.805	0.767797	-160.941	0.254261	-166.972	3.76818	0.180148
B6-2-3	33.5	-31.2772	0.0705042	-31.2491	0.0072312	-31.4891	0.00677925	-31.3399	-161.412	1.31093	-168.856	0.341981	-158.8	0.303813	-167.567	3.45733	0.324492
B6-2-2.5	33.5082	-31.5497	0.0020482	-31.3208	0.131597	-31.9578	0.141838	-31.6368	-159.587	1.93278	-162.412	0.341521	-161.467	1.79086	-165.697	3.63329	0.17594
B6-2-2	33.5153	-30.8844	0.155019	-30.8455	0.101689	-31.3047	0.19479	-31.0235	-158.252	N/A	-164.182	N/A	-165.534	N/A	-167.366	3.23916	0.264866
B6-2-1.5	33.5271	-30.8594	0.0183464	-30.669	0.0480974	-31.3126	0.00247925	-30.9639	-153.902	0.462748	-157.57	1.03349	-155.57	3.83502	-160.184	2.8446	0.318657
B6-2-1	33.5376	-30.8944	0.22048	-30.976	0.11024	-31.2587	0.21702	-31.057	-159.67	4.68485	-173.623	4.87093	-165.371	1.82489	-171.034	3.07192	0.33489
B6-3-4	33.55	-30.7471	0.122599	-31.0116	0.117161	-31.5212	0.104802	-31.1231	-171.007	1.83146	-177.095	0.843424	-165.845	0.182034	-175.689	3.57574	0.270882
B6-3-3.75	33.5588	-30.7868	0.0373958	-30.3567	0.0570778	-31.0643	0.0127933	-30.745	-165.526	1.94563	-163.765	1.43686	-164.902	1.38393	-168.951	3.20781	0.265299
B6-3-3.5	33.5698	-30.93	0.161808	-30.6772	0.201249	-31.3143	0.192147	-30.9826	-169.505	1.29834	-166.769	1.56953	-165.679	2.18396	-171.432	3.17395	0.276051
B6-3-3	33.5822	-30.7935	0.00349895	-30.909	0.0309907	-31.3548	0.0089973	-31.0531	-178.049	0.310955	-173.324	1.58341	-167.922	1.22875	-176.656	3.73765	0.174539
B6-3-2.75	33.5919	-30.4158	0.231755	-30.8598	0.122134	-31.4664	0.141155	-30.9405	-161.28	2.86858	-163.639	0.464389	-155.473	0.560176	-164.511	3.7541	0.251762
B6-3-2.5	33.6	-30.2992	0.0931023	-30.6581	0.0725798	-31.3278	0.0675743	-30.8281	-167.428	0.174522	-163.587	0.641418	-160.582	0.218152	-167.649	4.08458	0.160161
B6-3-2	33.616	-30.5421	0.105968	-30.886	0.0219934	-31.3783	0.0234929	-30.975	-179.645	2.62729	-175.146	0.637985	-166.035	0.41042	-177.319	3.74976	0.209418
B6-3-1.75	33.634	-30.862	0.0558135	-30.9521	0.081416	-31.5712	0.103434	-31.1522	-167.099	0.0446335	-160.742	0.590767	-154.713	1.00701	-164.506	3.50784	0.242067
B6-3-1.5	33.65	-31.3495	0.0691267	-31.3136	0.0660544	-31.9721	0.0844882	-31.5694	-166.863	0.13691	-161.385	3.21161	-154.618	0.576223	-164.465	3.87741	0.193955
B6-3-1	33.6586	-31.01	0.045647	-31.0421	0.0117507	-31.4001	0.0298287	-31.1614	-168.998	0.724023	-168.572	1.37933	-160.938	0.729076	-170.259	3.5299	0.252314
B6-4-5.5	33.6681	-30.8086	0.217318	-30.791	0.121235	-31.3126	0.0231403	-30.9955	-178.391	2.36253	-174.367	0.087482	-171.39	0.213559	-178.458	3.54545	0.199753
B6-4-5	33.6804	-30.9621	0.0934322	-31.0032	0.009887	-31.6503	0.0766242	-31.2381	-171.41	1.41734	-180.65	3.62602	-167.955	1.45122	-177.966	3.72841	0.197287
B6-4-4.5	33.6909	-31.2095	0.0337044	-31.4479	0.125259	-31.7146	0.124253	-31.495	-179.222	0.299138	-183.507	0.510147	-178.468	0.229642	-184.875	3.95155	0.194933
B6-4-4	33.7	-31.0944	0.117465	-31.0589	0.0589823	-31.2044	0.063481	-31.121	-166.225	2.33693	-170.694	2.00086	-163.988	1.18052	-171.407	3.46202	0.234638
B6-4-3	33.7116	-30.7675	0.0544837	-30.6965	0.0224933	-31.0964	0.0114966	-30.8652	-165.914	1.74265	-168.284	2.11439	-163.542	0.173813	-165.909	3.32135	0.259412
B6-4-2	33.7237	-29.3589	0.136459	-30.0502	0.0329901	-30.7795	0.0304908	-30.065	-167.817	2.66446	-170.79	4.23782	-169.105	3.44713	-169.249	3.08709	0.417757
B6-4-1	33.7299	-29.4974	0.0009997	-30.1317	0.0724782	-30.861	0.0169949	-30.1884	-161.919	1.01726	-163.805	0.750009	-165.012	1.64469	-163.641	3.16051	0.379963
B6-5-6	33.7344	-30.6654	0.199828	-30.836	0.22462	-31.2867	0.122971	-30.9661	-165.126	0.723585	-169.376	1.79405	-162.355	0.825221	-165.691	3.37664	0.245998
B6-5-5.75	33.7379	-30.7578	0.229083	-30.8197	0.107599	-31.4306	0.0451224	-31.033	-152.727	0.075225	-155.614	3.70458	-152.775	1.7036	-153.823	3.20118	0.297949
B6-5-5.5	33.742	-30.8035	0.251525	-30.7261	0.185122	-31.5626	0.289254	-31.0651	-176.643	0.779711	-176.361	4.64983	-172.183	2.97924	-174.832	3.19889	0.266562
B6-5-5	33.75	-31.1851	0.0976824	-31.0492	0.155201	-31.4637	0.120492	-31.2398	-166.842	0.297322	-172.015	1.0558	-165.408	0.762015	-168.21	3.43888	0.262728
B6-5-4	33.7519	-30.0788	0.0545435	-30.7765	0.0213216	-31.4092	0.0203298	-30.7554	-170.153	2.83497	-169.9	2.0937	-167.407	1.87835	-169.18	3.30701	0.35975
B6-5-3.5	33.7544	-29.2345	0.0417531	-30.627	0.109162	-31.0571	0.140854	-30.3185	-178.163	0.644761	-180.773	1.87896	-175.772	1.85259	-178.26	3.3982	0.37234
B6-5-3	33.7569	-29.6033	0.101649	-30.3005	0.0927239	-31.2262	0.0406597	-30.3771	-169.816	2.71433	-169.397	2.00148	-167.882	0.031904	-169.035	3.31899	0.359636
B6-5-2.5	33.7591	-28.9599	0.117187	-29.9886	0.0570912	-30.3086	0.500299	-29.7801	-169.329	0.0419609	-170.307	1.75864	-168.434	2.94363	-169.366	3.45431	0.338457
B6-5-2	33.7622	-29.5284	0.181481	-30.5063	0.0357012	-31.2128	0.0431389	-30.4361	-169.565	0.961108	-170.867	0.408272	-166.976	1.08972	-169.127	3.25791	0.370745
B6-5-1.5	33.7652	-29.728	0.299818	-30.1928	0.0784758	-31.0903	0.210275	-30.3592	-169.928	0.343838	-174.156	2.7233	-175.108	1.03927	-173.159	3.17234	0.39197
B6-5-1	33.7673	-29.3638	0.232058	-29.9291	0.370896	-30.7785	0.237512	-30.0465	-170.315	0.838975	-171.071	1.33997	-170.92	1.23179	-170.78	3.2011	0.397044
B6-5-0.5	33.769	-29.38	0.140609	-30.463	0.352218	-31.0447	0.0454676	-30.3379	-170.724	2.87095	-167.622	4.99963	-170.764	1.78601	-169.661	3.10719	0.41073
B6-6-6	33.7712	-29.6634	0.0745484	-30.6085	0.144683	-31.4232	0.0039236	-30.5952	-172.355	0.433848	-176.743	1.43099	-173.333	0.861628	-174.205	3.28667	0.353474
B6-6-5.5	33.7736	-30.4606	0.0902737	-30.7638	0.121196	-31.7074	0.0483787	-31.0344	-168.235	2.66759	-165.447	3.67169	-168.011	5.11772	-167.204	3.10814	0.367572
B6-6-5	33.7764	-29.4535	0.058854	-30.3922	0.162829	-31.2177	0.0554209	-30.3795	-167.247	1.13569	-174.685	1.51644	-168.251	2.57072	-170.142	3.26146	0.34927
B6-6-4.5	33.7791	-29.882	0.0184537	-30.701	0.0214463	-31.6067	0.0124688	-30.8117	-169.816	3.8513	-170.499	6.42051	-169.946	3.06173	-170.094	3.10675	0.338865
B6-6-4	33.7813	-29.4432	0.108389	-30.278	0.0210893	-31.173	0.186371	-30.3391	-166.401	0.794925	-171.909	4.24854	-167.175	1.2628	-168.566	3.01176	0.354704
B6-6-3.5	33.7838	-29.8982	0.088816	-30.6483	0.061	-31.6726	0.00976	-30.8246	-171.635	5.7832	-167.606	1.65404	-171.153	1.83501	-170.086	3.03428	0.340964
B6-6-3	33.7868	-29.5202	0.158906	-30.4486	0.0102995	-31.3202	0.107899	-30.4965	-165.646	3.16216	-176.678	0.0247608	-167.276	0.240386	-170.06	3.36726	0.315234
B6-6-2.5	33.7896	-29.3538	0.066312	-30.3008	0.0584528	-31.1722	0.0839952	-30.364	-164.322	0.834002	-170.106	0.995838	-170.669	1.35881	-168.693	3.25472	0.35868
B6-6-2	33.7926	-29.4893	0.269257	-30.7233	0.331054	-31.4766	0.268276	-30.6324	-162.929	0.65513	-176.921	2.0015	-167.066	0.0268242	-169.299	3.25958	0.333216
B6-6-1.5	33.7956	-29.5098	0.208486	-30.3708	0.180364	-31.3032	0.115879	-30.4949	-161.387	5.58823	-165.939	3.43973	-159.095	2.17931	-162.041	2.95276	0.385594
B6-6-1	33.7975	-29.5512	0.123963	-30.2087	0.0664439	-31.0175	0.0361971	-30.3113	-164.487	3.85052	-166.869	0.33828	-164.418	1.96951	-165.288	3.32022	0.332244
B7-1-1	33.8	-29.3576	0.0073635	-30.1857	0.0137452	-30.8715	0.0034363	-30.1756	-161.163	0.678115	-165.422	0.432764	-167.125	0.819683	-164.726	2.72593	0.450715
B7-2-1	33.8028	-29.3851	0.0004974	-30.2724	0.13579	-31.1946	0.204431	-30.2827	-172.368	0.905832	-171.237	3.50997	-169.647	1.83333	-171.085	3.28169	0.412195
B7-2-2	33.805	-29.6379	0.124689	-30.47	0.151688	-31.1592	0.276377	-30.4283	-172.573	0.541585	-179.85	1.4318	-167.915	0.530501	-173.438	3.20214	0.409555
B7-2-3	33.8075	-28.7828	0.282758	-30.0228	0.0618534	-30.9933	0.0103089	-29.9971	-168.483	0.647982	-171.34	3.82787	-166.584	1.10306	-168.742	3.08341	0.344726
B7-2-4	33.8105	-29.162	0.121499	-30.252	0.0212377	-31.0719	0.0251889	-30.2152	-161.251	3.28856	-165.005	0.141699	-163.788	1.97758	-163.41	3.33669	0.342818
B7-2-5	33.8132	-29.0748	0.010395	-30.1683	0.08019	-31.0013	0.017325	-30.1497	-167.626	4.27063	-171.881	3.15167	-162.484	1.48425	-167.16	3.4112	0.342347
B7-2-6	33.8146	-29.4025	0.209907	-30.1607	0.167926	-31.2557	0.0735911	-30.3259	-158.363	4.00843	-164.762	2.15445	-159.851	1.46715	-161.054	3.42864	0.362138
B7-3-1	33.8183	-29.5045	0.0892763	-30.4262	0.122194	-31.1275	0.0364087	-30.428	-157.051	2.1441	-161.623	0.207377	-161.476	0.197034	-160.284	3.52276	0.230108
B7-3-2	33.8221	-29.1457	0.261273	-29.9804	0.0409937	-30.6116	0.232627	-29.9686	-156.849	1.17755	-160.665	3.96033	-158.719	0.6061	-158.837	3.45131	0.339283
B7-3-3	33.825	-29.2751	0.141749	-30.0505	0.0538351	-30.8734	0.0212377	-30.1064	-160.433	1.05705	-159.744	3.4556	-161.512	2.12859	-160.584	3.40248	0.344396
B7-3-4	33.8287	-29.5674	0.0194512	-30.316	0.0049875	-31.2113	0.00049875	-30.4353	-165.86	1.55869	-168.141	4.65585	-165.43	0.261425	-166.466	3.44261	0.320932
B7-3-5	33.8327	-29.7615	0.024108	-30.5349	0.119556	-31.5199	0.010332	-30.5925	-165.359	1.54241	-164.707	0.594202	-165.365	0.346661	-165.139	3.30717	0.411149
B7-3-6	33.8348	-29.586	0.009914	-30.4366	0.0257764	-31.4603	0.0708851	-30.4939	-167.291	0.883698	-168.372	0.812897	-166.43	1.51461	-167.37	3.12808	0.3647
B7-4-1	33.8409	-29.3644	0.002952	-30.2234	0.047232	-31.175	0.030504	-30.2457	-165.406	1.52353	-167.529	2.24622	-163.545	3.32921	-165.507	3.35449	0.368272
B7-4-2	33.8462	-28.7933	0.0673312	-29.5664	0.185036	-30.6552	0.153615	-29.6538	-167.267	0.828107	-167.272	0.711679	-163.169	1.52353	-165.939	3.32205	0.402892
B7-4-3	33.85	-29.2931	0.08118	-30.2023	0.028044	-31.0303	0.035424	-30.1752	-163.965	1.18368	-163.527	1.47528	-164.477	1.15117	-163.98	3.48613	0.411115
B7-4-4	33.8516	-28.8591	0.084132	-29.8677	0.04182	-30.835	0.0861	-29.915	-159.209	0.242296	-161.908	0.361871	-161.686	0.787724	-161.02	3.58043	0.345298
B7-4-5	33.8532	-29.388	0.00492	-29.9519	0.023616	-31.0097	0.433944	-30.1513	-164.574	1.17436	-170.64	2.76029	-168.735	3.34103	-168.17	3.46457	0.376583
B7-4-6	33.854	-29.2123	0.0505614	-30.0906	0.019828	-30.8961	0.0857561	-30.0938	-160.245	4.13064	-163.302	2.69634	-164.584	2.56018	-162.787	3.35507	0.407936
B7-5-1	33.8558	-29.006	0.0128882	-29.7664	0.044613	-30.8218	0.0173495	-29.8679	-164.695	3.1667	-164.653	2.23939	-164.871	2.1218	-164.739	3.3445	0.419592
B7-5-2	33.8582	-29.0824	0.0505614	-29.936	0.0634496	-30.912	0.0956701	-29.9805	-167.655	0.0438388	-167.064	0.0773625	-167.72	2.01813	-167.477	3.36877	0.409201
B7-5-3	33.8597	-28.8058	0.0723722	-29.5553	0.178452	-30.4634	0.140779	-29.7148	-162.379	3.56693	-176.447	0.662739	-168.58	1.54673	-169.839	3.60144	0.339573
B7-5-4	33.8613	-29.028	0.0144536	-29.9949	0.229762	-30.6453	0.120613	-29.9635	-161.517	1.53487	-172.519	0.411053	-166.025	0.535864	-167.062	3.42993	0.377417
B7-5-5	33.8632	-29.5179	0.148523	-30.0871	0.039872	-30.9897	0.138057	-30.1733	-159.343	1.2966	-164.611	0.72566	-158.214	2.86757	-160.772	3.09776	0.468221
B7-5-6	33.8639	-29.496	0.0368816	-29.9141	0.0294056	-31.0555	0.11513	-30.1699	-155.726	2.5866	-160.249	0.642258	-156.494	1.93556	-157.525	3.25865	0.442744
B7-6-1	33.8659	-29.1177	0.249698	-30.0716	0.133073	-31.2299	0.03738	-30.2079	-160.737	0.581491	-165.942	0.481572	-165.974	0.505779	-164.393	3.47224	0.385746
B7-6-2	33.8735	-29.3509	0.082236	-29.8792	0.121111	-30.9184	0.187398	-30.0566	-160.147	2.51499	-165.396	2.01591	-162.077	1.18461	-162.585	3.21384	0.428583
B8-1-1	33.875	-28.9397	0.04902	-29.9211	0.164831	-30.7082	0.0665974	-29.945	-156.504	0.0070147	-157.989	1.21705	-160.027	0.314659	-158.482	2.70713	0.533038
B8-2-1	33.8833	-29.3088	0.163265	-29.8129	0.208776	-31.0115	0.182606	-30.1381	-165.356	1.74015	-160.83	1.53772	-163.109	0.259043	-162.917	3.48978	0.352643
B8-2-2	33.8894	-29.4458	0.060719	-30.1957	0.0483777	-31.2023	0.0360364	-30.3464	-167.161	0.274074	-171.941	1.11484	-168.501	0.355244	-169.291	3.27053	0.359206
B8-3-1	33.8935	-29.2425	0.397887	-30.108	0.210745	-31.213	0.247593	-30.2929	-172.186	0.373282	-169.501	2.71018	-160.654	0.127267	-166.862	3.44333	0.304389
B8-4-1	33.9	-29.6801	0.0516533	-30.4711	0.0840397	-31.4928	0.0766319	-30.6111	-164.537	1.34131	-163.396	0.986066	-159.968	0.43441	-162.486	3.32934	0.353726
B8-5-1	33.9058	-29.1635	0.0896348	-29.8425	0.150396	-30.9182	0.150199	-30.0406	-167.78	1.1429	-163.475	0.676417	-158.397	4.83764	-162.844	3.59598	0.366477
B8-5-2	33.9143	-29.0519	0.126017	-29.3592	0.121766	-30.7162	0.246213	-29.7874	-151.1	9.46611	-155.625	4.47487	-154.312	3.27201	-153.95	3.6215	0.288699
B8-6-1	33.9208	-28.9782	0.0280186	-29.6628	0.0122537	-30.6788	0.0568744	-29.8367	-171.285	0	-170.914	0	-163.903	0	-168.492	3.25561	0.36346
B8-6-2	33.925	-29.2325	0.12587	-29.6363	0.290005	-30.8265	0.197842	-29.9252	-170.204	0.895376	-164.872	3.28689	-158.805	4.49241	-164.359	3.48767	0.389026
B9-1-1	33.9369	-29.3732	0.103821	-29.9536	0.0171479	-30.8578	0.157837	-30.165	-127.352	1.16761	-160.234	1.98635	-162.274	1.7126	-152.839	3.14167	0.337702
B9-1-2	33.95	-29.1227	0.0517828	-29.4395	0.124927	-30.625	0.061693	-29.8029	-168.303	0.0234882	-165.434	0.72014	-154.071	1.07046	-161.906	3.5544	0.285866
B9-2-1	33.9576	-28.969	0.113046	-29.5683	0.0567698	-30.6217	0.0666428	-29.7625	-153.154	1.92132	-160.943	2.87164	-159.086	2.2112	-158.012	3.36092	0.352872
B9-2-2	33.9664	-29.2351	0.0740475	-29.552	0.0256698	-30.4993	0.070592	-29.8151	-152.254	4.24444	-162.091	7.06818	-165.326	1.74385	-160.608	3.64869	0.278739
B9-2-3	33.975	-29.1413	0.0414666	-29.5752	0.0636808	-30.6666	0.0078984	-29.8904	-160.604	2.94424	-165.529	0.503646	-166.427	0.744125	-164.656	3.4647	0.233786
B9-3-1	33.9805	-29.3649	0.113046	-29.9341	0.0928062	-31.0295	0.117982	-30.2144	-165.995	2.44379	-169.157	1.8514	-169.251	1.9406	-168.383	3.49624	0.248718
B9-3-2	33.9844	-28.9759	0.132792	-29.5786	0.167841	-30.637	0.0661491	-29.7818	-149.171	2.95637	-163.715	0.328826	-160.533	0.375291	-158.451	3.32481	0.325645
B9-4-1	33.9904	-28.7977	0.0681237	-29.4868	0.0513396	-30.3394	0.0656555	-29.6227	-150.066	2.25643	-169.533	1.02116	-167.639	0.483129	-163.658	3.3327	0.321274
B9-4-2	33.9948	-29.2514	0.0554445	-29.9402	0.075924	-30.9932	0.114885	-30.1294	-161.156	0.455179	-168.783	2.42962	-170.706	0.337891	-167.36	3.36043	0.312407
B9-5-1	34	-29.0736	0.0894105	-29.8213	0.037962	-30.669	0.0274725	-29.9278	-164.135	1.54771	-128.005	0.709221	-163.108	3.50718	-150.719	3.19868	0.408123
B9-5-2	34.0078	-28.8099	0.0504495	-29.3348	0.034965	-30.65	0.237262	-29.6953	-152.951	7.0586	-116.919	6.22272	-156.176	2.61704	-141.065	3.23539	0.402223
B10-2-1	34.012	-28.4602	0.171329	-28.9257	0.0254745	-30.0156	0.0494505	-29.2536	-148.466	1.0209	-154.17	1.64454	-154.257	0.805632	-152.863	3.95089	0.256886
B10-2-2	34.0164	-28.2559	0.022977	-28.8029	0.0844155	-29.7414	0.185814	-29.0219	-141.211	2.42467	-147.31	1.44416	-148.283	0.918591	-146.127	3.8241	0.290249
B10-3-1	34.0207	-28.1485	0.116384	-28.5186	0.127872	-29.3963	0.0524475	-28.7895	-158.229	1.08105	-158.547	0.41575	-163.718	0.411258	-160.571	3.97678	0.264599
B10-3-2	34.025	-28.2145	0.156343	-28.4222	0.0954045	-29.5611	0.0384615	-28.8148	-154.459	0.407266	-157.511	1.18087	-159.172	0.998699	-157.399	3.84132	0.273826
B10-4-1	34.0289	-28.9424	0.090022	-29.3431	0.159985	-30.2301	0.107635	-29.5643	-162.022	3.27948	-159.621	0.138542	-159.488	1.672	-160.209	3.51319	0.301277
B10-4-2	34.0323	-28.7694	0.0009951	-29.3048	0.0268677	-30.1959	0.0761252	-29.5184	-160.6	2.47374	-160.336	0.636191	-164.567	1.06832	-162.038	3.67345	0.270293
B10-5-1	34.036	-28.9297	0.005871	-29.3509	0.0249518	-30.3867	0.084151	-29.7109	-157.39	1.78804	-166.425	0.507152	-163.501	0.139042	-163.288	3.43181	0.262541
B10-5-2	34.0388	-28.8043	0.237829	-29.5536	0.0348285	-30.681	0.0706521	-29.8938	-155.682	0.171051	-166.413	0.996299	-165.191	1.15085	-163.781	3.7892	0.176558
B10-6-1	34.0467	-28.7555	0.151668	-29.2844	0.20206	-30.3074	0.142861	-29.6115	-154.594	1.45394	-161.729	1.48995	-162.65	0.162549	-160.604	2.83081	0.43529
B10-6-2	34.05	-29.3794	0.107471	-29.9959	0.074135	-30.9945	0.0537354	-30.3293	-152.365	1.72852	-164.034	2.0036	-165.041	1.15185	-162.233	3.00662	0.33986
B11-1-1	34.0639	-28.9879	0.0269088	-29.2521	0.117909	-30.5119	0.233861	-29.6782	-163.577	2.20416	-165.896	0.447134	-160.857	0.459638	-163.372	3.32905	0.329787
B11-2-1	34.075	-28.7966	0.1047	-29.2012	0.112038	-30.1259	0.0200593	-29.529	-161.274	0.195059	-166.51	0.39962	-166.474	2.3362	-165.433	3.80563	0.174746
B11-2-2	34.0868	-29.3118	0.0059706	-29.8038	0.0801056	-30.8019	0.0781153	-30.1034	-162.054	0.104031	-169.167	1.07332	-163.444	0.972292	-165.225	3.34316	0.292274
B11-3-1	34.1	-29.0814	0.0184094	-29.2013	0.154241	-30.2382	0.0308481	-29.5969	-151.878	1.08583	-159.94	0.928779	-159.644	2.41372	-157.938	3.85904	0.222944
B11-3-2	34.105	-28.9854	0.119028	-29.3341	0.110597	-30.3245	0.11506	-29.6988	-162.161	0.23407	-160.605	0.180054	-157.921	1.43993	-159.743	3.00773	0.389446
B11-4-1	34.1122	-29.3559	0.0104149	-29.7512	0.0327327	-30.7704	0.123492	-30.0433	-163.811	3.60558	-162.488	0.263579	-161.395	0.858758	-162.401	3.42304	0.284057
B11-4-2	34.1179	-28.9497	0.0545545	-29.5409	0.0287651	-30.5517	0.0039676	-29.8455	-160.01	0.176053	-163.476	0.93428	-161.407	0.294588	-161.853	3.47078	0.263251
B11-5-1	34.125	-29.1223	0.0753844	-29.352	0.0203339	-30.5442	0.0520747	-29.7831	-155.475	0.943783	-161.425	0.861258	-157.577	0.171551	-158.522	3.55653	0.349079
B11-5-2	34.1304	-29.0623	0.0679451	-29.4869	0.00743925	-30.6355	0.23756	-29.8535	-139.082	4.97599	-150.284	0.83225	-151.077	3.36551	-148.051	2.76131	0.494317
a Carbon preference index (CPI) is calculated using equation (3)
b Aquatic to terrestial plants ratio (Paq) is calculated using equation (4)
N/A: error is not avalibale due to no replicate analysis
